# Supplementary material for: Gli1 marks a sentinel muscle stem cell population for muscle regeneration
Source: PubMed Central journal article supplement (PMC10620419; doi:10.1038/s41467-023-42837-8), 2023-11-01
Supplement: 41467_2023_42837_MOESM1_ESM.pdf [file 41467_2023_42837_MOESM1_ESM.pdf]

1  
2  
3                   **Supplementary Materials for**  
4                   **Gli1 marks a sentinel muscle stem cell population for muscle**  
5                   **regeneration**

6    Jiayin Peng, Lili Han, Biao Liu, Jiawen Song, Yuang Wang, Kunpeng Wang, Qian Guo,  
7    XinYan Liu, Yu Li, Jujin Zhang, Wenqing Wu, Sheng Li, Xin Fu, Cheng-le Zhuang,  
8    Weikang Zhang, Shengbao Suo, Ping Hu<sup>#</sup>, Yun Zhao<sup>#</sup>

9  
10           Correspondence to: yunzhao@sibcb.ac.cn (Y.Z.), hup@sibcb.ac.cn (P.H.)

11  
12  
13    **This PDF file includes:**

14           Figs. S1 to S10

15           Tables S1 to S3

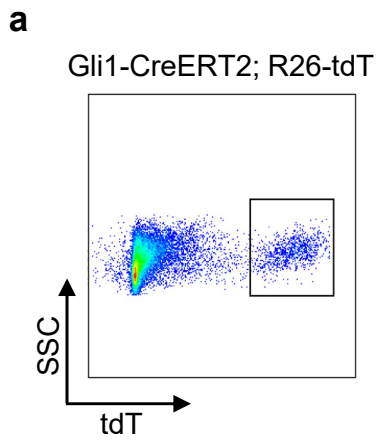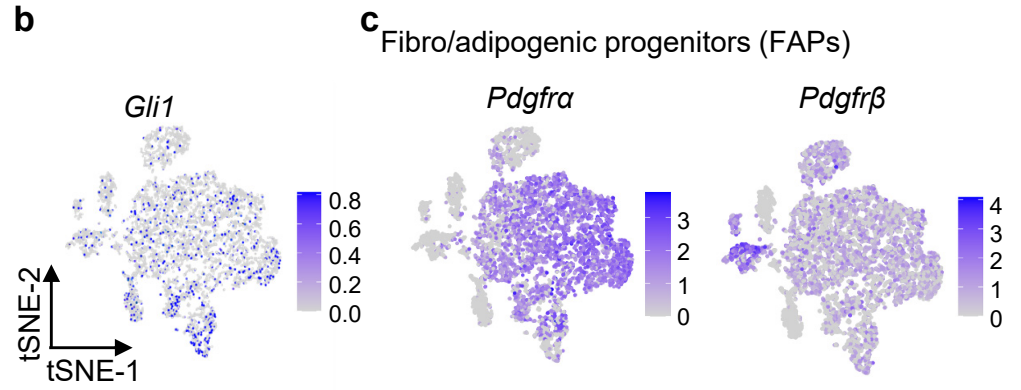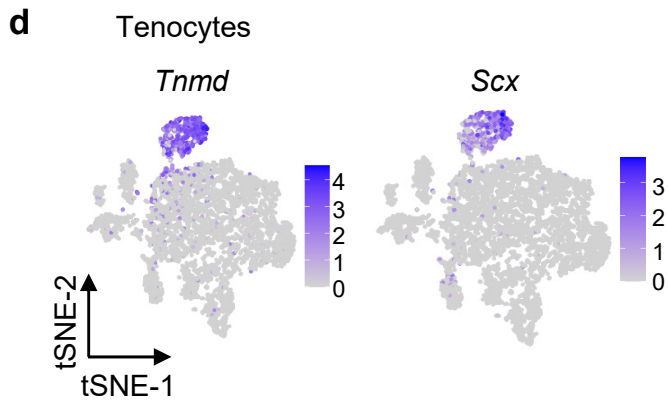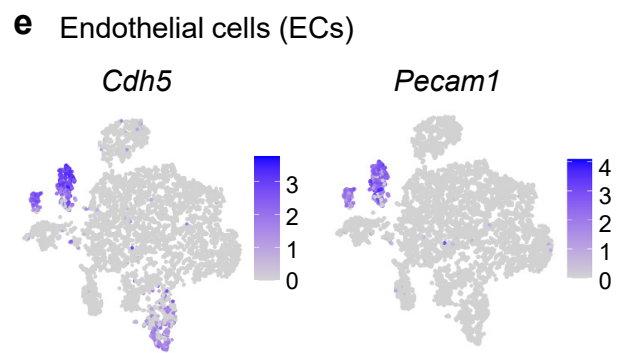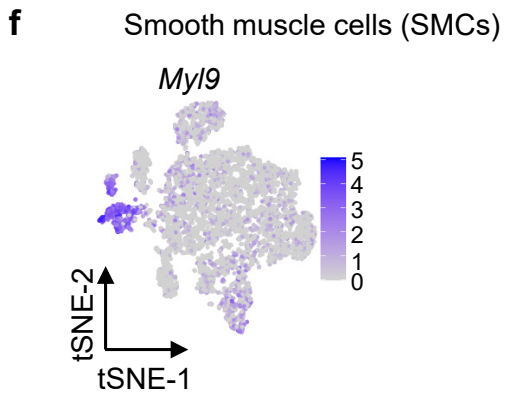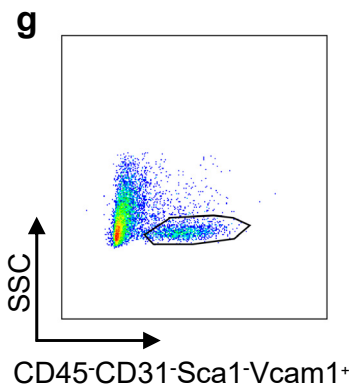

16 **Supplementary Fig. 1 scRNA-seq analysis of Gli1<sup>+</sup> cell distribution.**

17 **a** Representative profile of FACS-sorted tdT<sup>+</sup> (Gli1<sup>+</sup>) cell populations from Gli1-CreERT2;  
18 R26-tdT mice for scRNA-seq (n = 3). Box represented the tdT<sup>+</sup> (Gli1<sup>+</sup>) cell populations. **b**  
19 Distribution of gene for *Gli1* across all subpopulations. **c** Distribution of genes for  
20 fibro/adipogenic progenitors (FAPs) (*Pdgfra* and *Pdgfrβ*) across all subpopulations. **d**  
21 Distribution of genes for tenocytes (*Tnmd* and *Scx*) across all subpopulations. **e**  
22 Distribution of genes for endothelial cells (ECs) (*Cdh5* and *Pecam1*) across all  
23 subpopulations. **f** Distribution of gene for smooth muscle cells (SMCs) (*Myh9*) across all  
24 subpopulations. **g** Representative profiles of FACS-sorted MuSCs from C57 WT mice for  
25 scRNA-seq (n = 3). Box represented the MuSC populations.

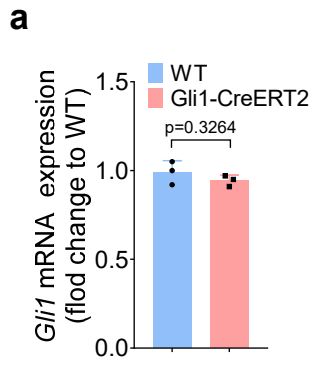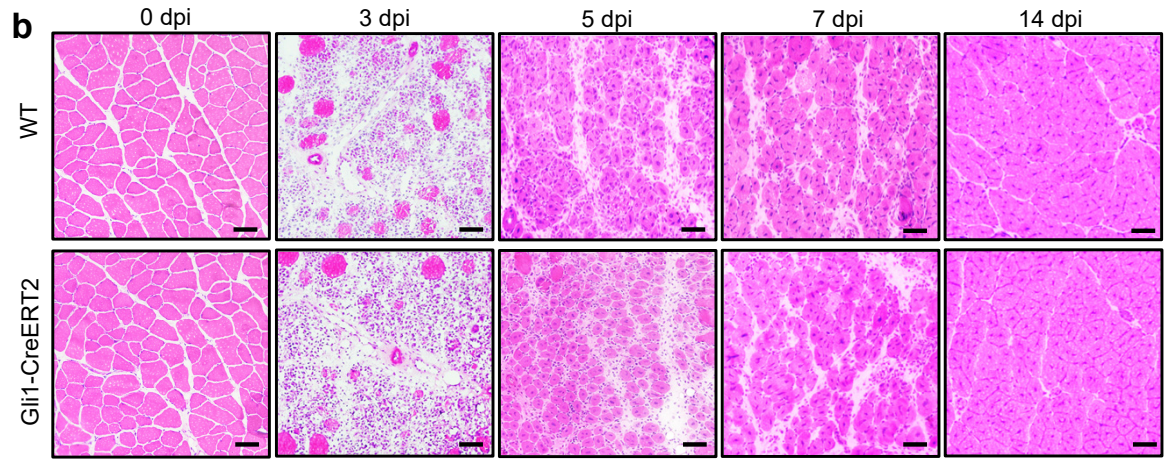

26 **Supplementary Fig. 2 Gli1-CreERT2 heterozygous does not affect muscle**  
27 **regeneration.**

28 **a** RT-qPCR for *Gli1* in MuSCs from Gli1-CreERT2 heterozygous compared to WT control  
29 mice (n = 3). **b** H&E-stained sections of injured TA muscles at different time point from  
30 WT control and Gli1-CreERT2 heterozygous mice (n = 3). Scale bars, 50  $\mu$ m. Data are  
31 presented as mean  $\pm$  SEM; Statistical significance was determined by two-tailed unpaired  
32 Student's *t* test (**a**). All numbers (n) are biologically independent experiments. Source  
33 data is provided in the Source Data File.

34

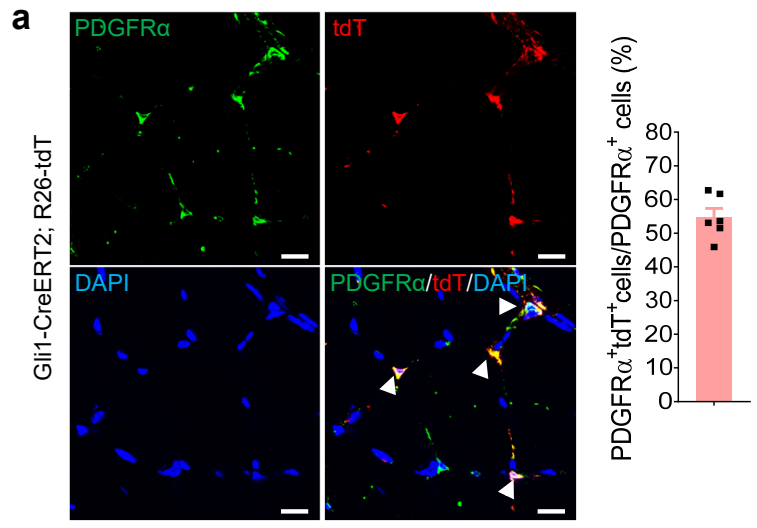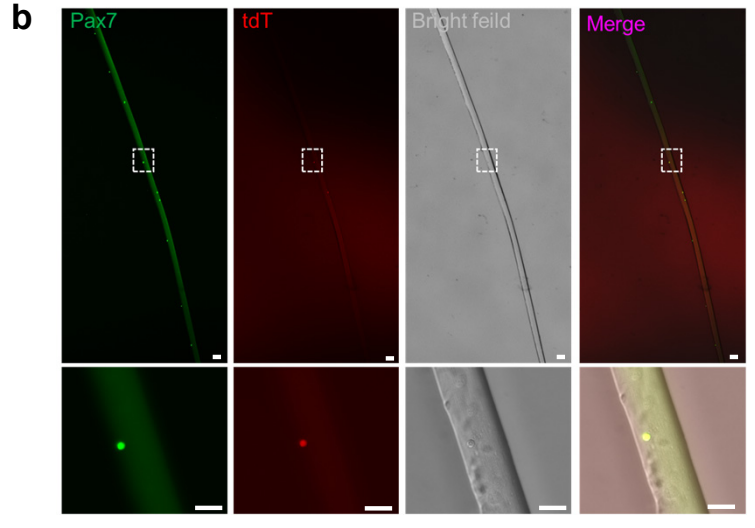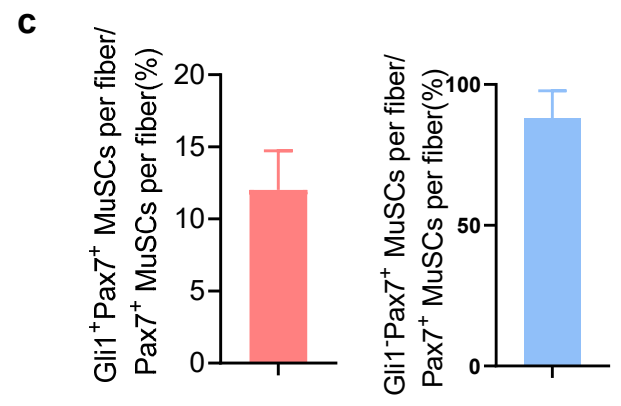

35 **Supplementary Fig. 3 Characterization of Gli1<sup>+</sup> cells in skeletal muscles and**  
36 **myofibers.**

37 **a** Left panel: Immunofluorescence staining for tdT (red), PDGFR $\alpha$  (green) and DAPI (blue)  
38 on TA muscle sections from Gli1-CreERT2; R26-tdT mice (n = 6). Arrow heads indicated  
39 the tdT<sup>+</sup> (Gli1<sup>+</sup>) PDGFR $\alpha$ <sup>+</sup> cells. Scale bars, 20  $\mu$ m. Right panel: Quantification of the  
40 percentage of PDGFR $\alpha$ <sup>+</sup> cells expressing tdT (n = 6). **b** Immunofluorescence staining for  
41 tdT (red), Pax7 (green) and DAPI (blue) in isolated single EDL myofibers (n = 13) from  
42 Gli1-CreERT2; R26-tdT mice. The boxed regions are magnified in the panels below with  
43 split channels. Scale bars, 20  $\mu$ m. **c** Left panel: Quantification analysis of the per fiber of  
44 Pax7<sup>+</sup> MuSCs cells expressing tdT<sup>+</sup> (Gli1<sup>+</sup>) (n = 13). Right panel: Quantification analysis  
45 of the per fiber of Pax7<sup>+</sup> MuSCs not expressing tdT<sup>-</sup> (Gli1<sup>-</sup>) (n = 13). Data are presented  
46 as mean  $\pm$  SEM. All numbers (n) are biologically independent experiments. Source data  
47 is provided in the Source Data File.

48

49

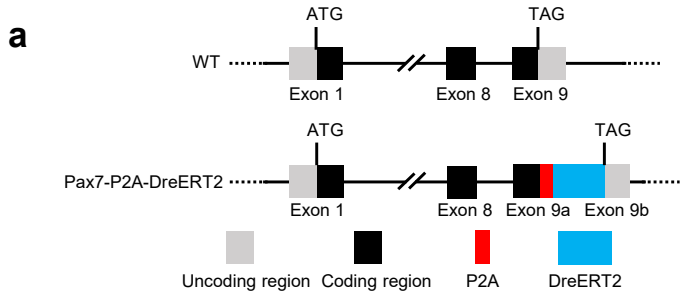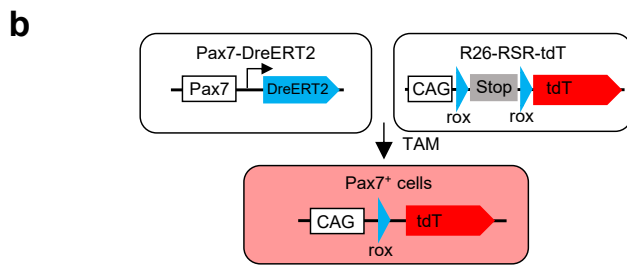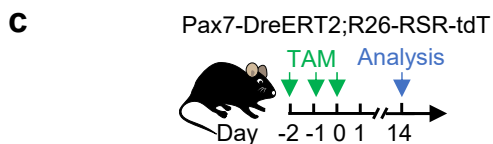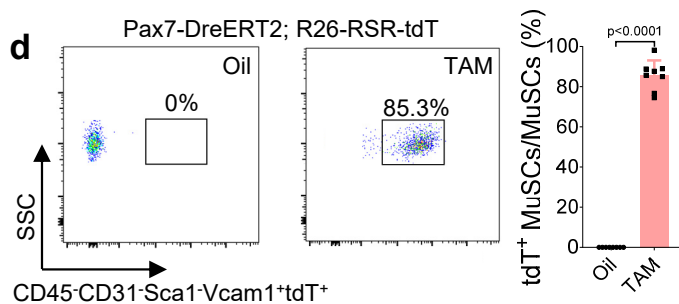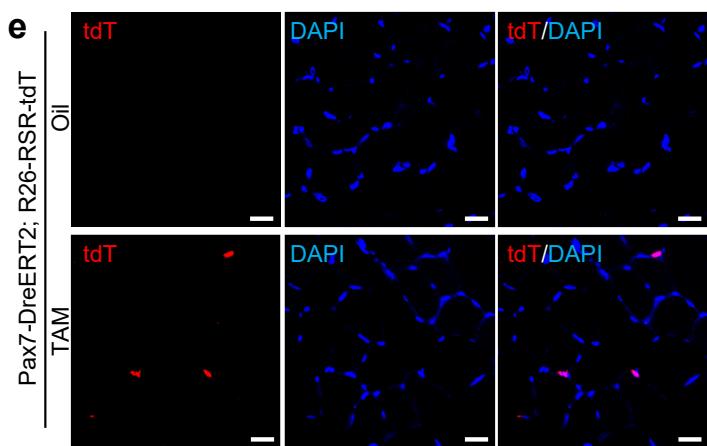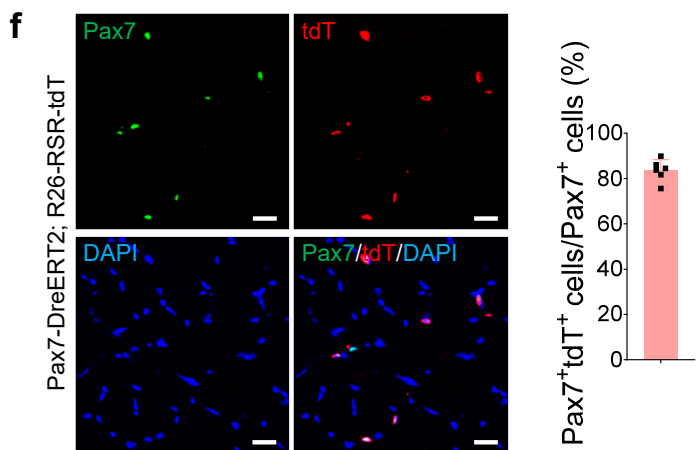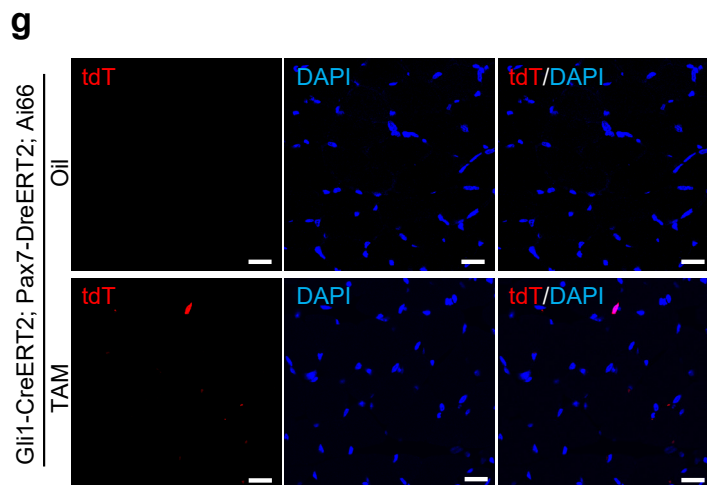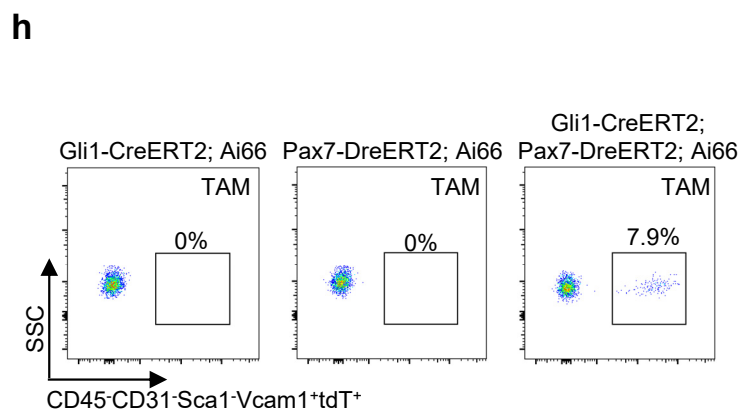



50 **Supplementary Fig. 4 Generation and characterization of Pax7-DreERT2 mouse**  
51 **allele.**

52 **a** Scheme of knock-in strategy for generation of Pax7-DreERT2 mouse. **b** Scheme of  
53 genetic lineage tracing strategy by Pax7-DreERT2; R26-RSR-tdT mice. **c** Scheme of the  
54 experimental strategy. **d** Left panel: Representative flow cytometry plots and the  
55 percentage of MuSCs expressing tdT with oil or TAM treatment (n = 8). Right panel:  
56 Quantification of the percentage of MuSCs expressing tdT (n = 8). **e** Immunofluorescence  
57 staining for tdT (red) and DAPI (blue) on TA muscle sections of Pax7-DreERT2; R26-  
58 RSR-tdT mice at day 14 with oil or TAM treatment (n = 6). Scale bars, 50  $\mu$ m. **f** Left panel:  
59 Immunofluorescence staining for tdT (red), Pax7 (green) and DAPI (blue) on TA muscle  
60 sections from Pax7-DreERT2; R26-RSR-tdT mice (n = 6). Scale bars, 50  $\mu$ m. Right panel:  
61 Quantification of the percentage of Pax7<sup>+</sup> cells expressing tdT (n = 6). **g**  
62 Immunofluorescence staining for tdT (red) and DAPI (blue) on TA muscle sections of Gli1-  
63 CreERT2; Pax7-DreERT2; Ai66 mice at day 14 with oil or TAM treatment (n = 5). Scale  
64 bars, 50  $\mu$ m. **h** Representative flow cytometry plots of MuSCs expressing tdT (n = 5). The  
65 percentage of tdT<sup>+</sup> (Gli1<sup>+</sup> Pax7<sup>+</sup>) MuSCs was 7.9%. Data are presented as mean  $\pm$  SEM;  
66 Statistical significance was determined by two-tailed unpaired Student's *t* test (**d**). All  
67 numbers (n) are biologically independent experiments. Source data is provided in the  
68 Source Data File.

69

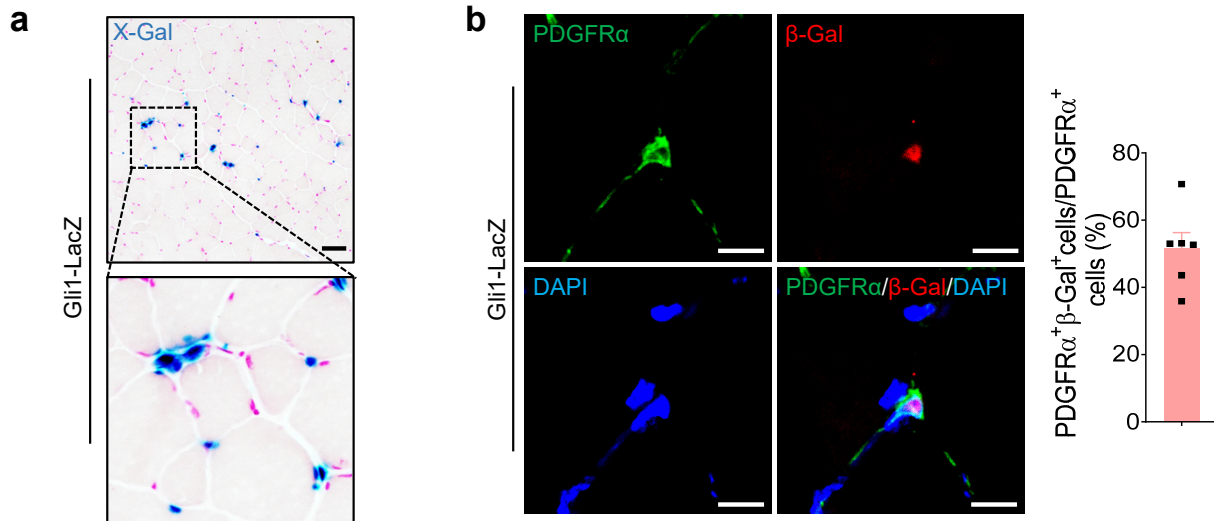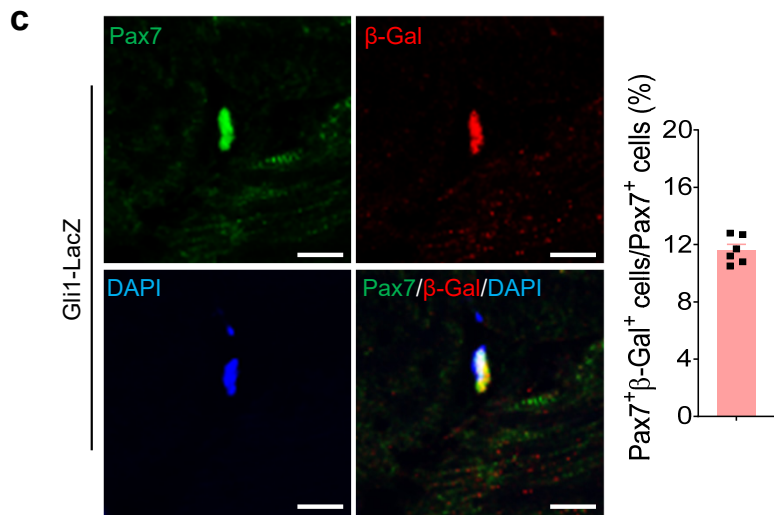

70 **Supplementary Fig. 5 Gli1 is expressed in MuSCs.**

71 **a** Representative histological images of X-Gal-stained TA muscle sections from Gli1-LacZ  
72 mice (n = 6). Scale bars, 200  $\mu$ m. **b** Left panel: Immunofluorescence staining for  $\beta$ -Gal  
73 (red), PDGFR $\alpha$  (green) and DAPI (blue) on TA muscle sections (n = 6). Scale bars, 10  
74  $\mu$ m. Right panel: Quantification of the percentage of PDGFR $\alpha$ <sup>+</sup> cells expressing  $\beta$ -Gal (n  
75 = 6). **c** Left panel: Immunofluorescence staining for  $\beta$ -Gal (red), Pax7 (green) and DAPI  
76 (blue) on TA muscle sections from Gli1-LacZ mice (n = 6). Scale bars, 10  $\mu$ m. Right panel:  
77 Quantification of the percentage of Pax7<sup>+</sup> cells expressing  $\beta$ -Gal. The percentage of  $\beta$ -  
78 Gal<sup>+</sup> (Gli1<sup>+</sup>) Pax7<sup>+</sup> cells was ~11.6% (n = 6). Data are presented as mean  $\pm$  SEM. All  
79 numbers (n) are biologically independent experiments. Source data is provided in the  
80 Source Data File.

81

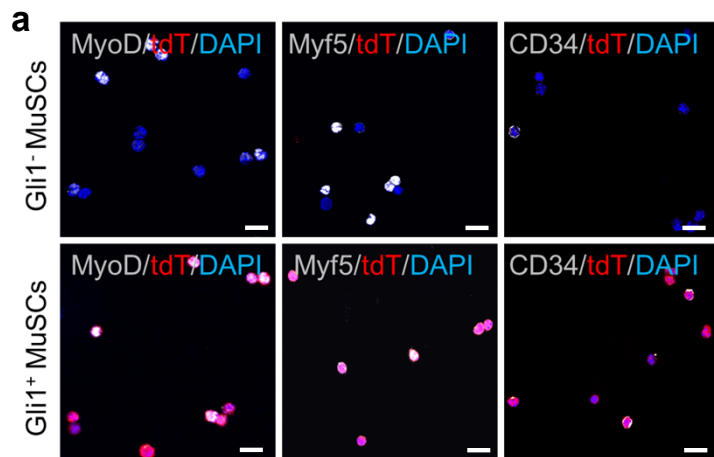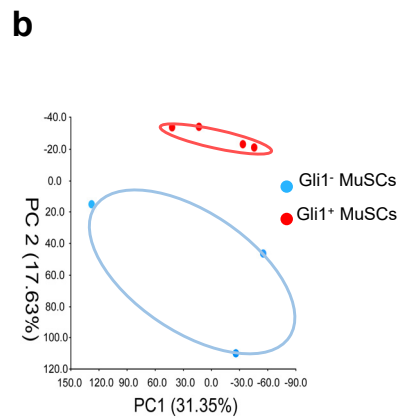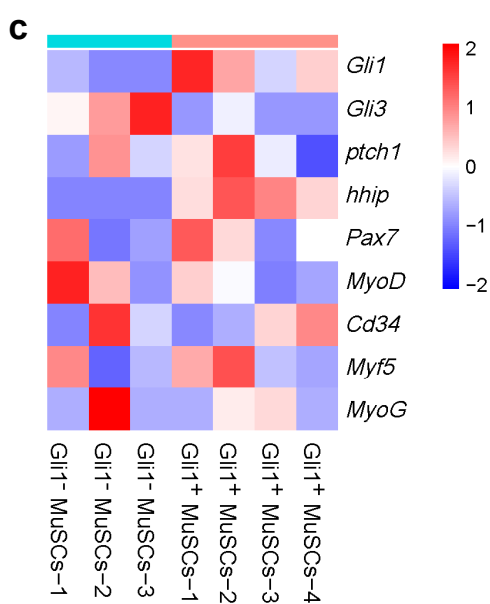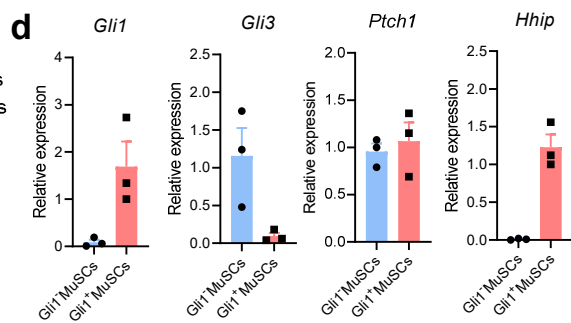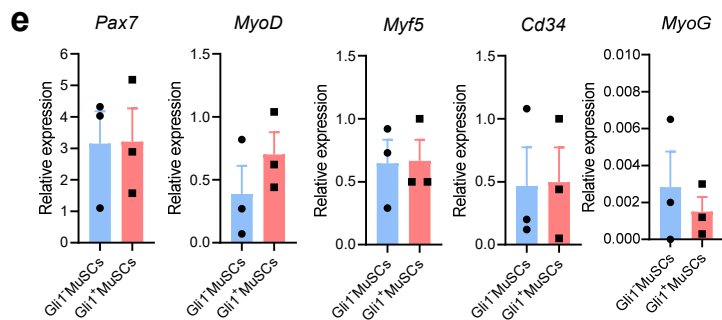

82 **Supplementary Fig. 6 The expression levels of the Hh signal pathway and**  
83 **myogenic genes in Gli1<sup>-</sup> MuSCs and Gli1<sup>+</sup> MuSCs.**

84 **a** Immunofluorescence staining for MyoD/Myf5/CD34 (white), tdT (red) and DAPI (blue)  
85 on tdT<sup>-</sup> (Gli1<sup>-</sup>) and tdT<sup>+</sup> (Gli1<sup>+</sup>) MuSCs (n = 3). Scale bars, 20 μm. **b** Principal component  
86 analysis (PCA) of the transcriptome data. **c** Heatmap of of the Hh signal pathway genes  
87 and myogenic genes. n = 3 mice for tdT<sup>-</sup> (Gli1<sup>-</sup>) MuSCs, n = 4 mice for tdT<sup>+</sup> (Gli1<sup>+</sup>) MuSCs.  
88 **d, e** Relative mRNA levels of the Hh signal pathway genes (**d**) and myogenic genes (**e**)  
89 were measured by RT-qPCR (n = 3). The red histogram represents gene expression level  
90 in tdT<sup>+</sup> (Gli1<sup>+</sup>) MuSCs. The blue histogram represents gene expression level in tdT<sup>-</sup> (Gli1<sup>-</sup>)  
91 MuSCs. Data are presented as mean ± SEM. All numbers (n) are biologically  
92 independent experiments. Source data is provided in the Source Data File.

93

94

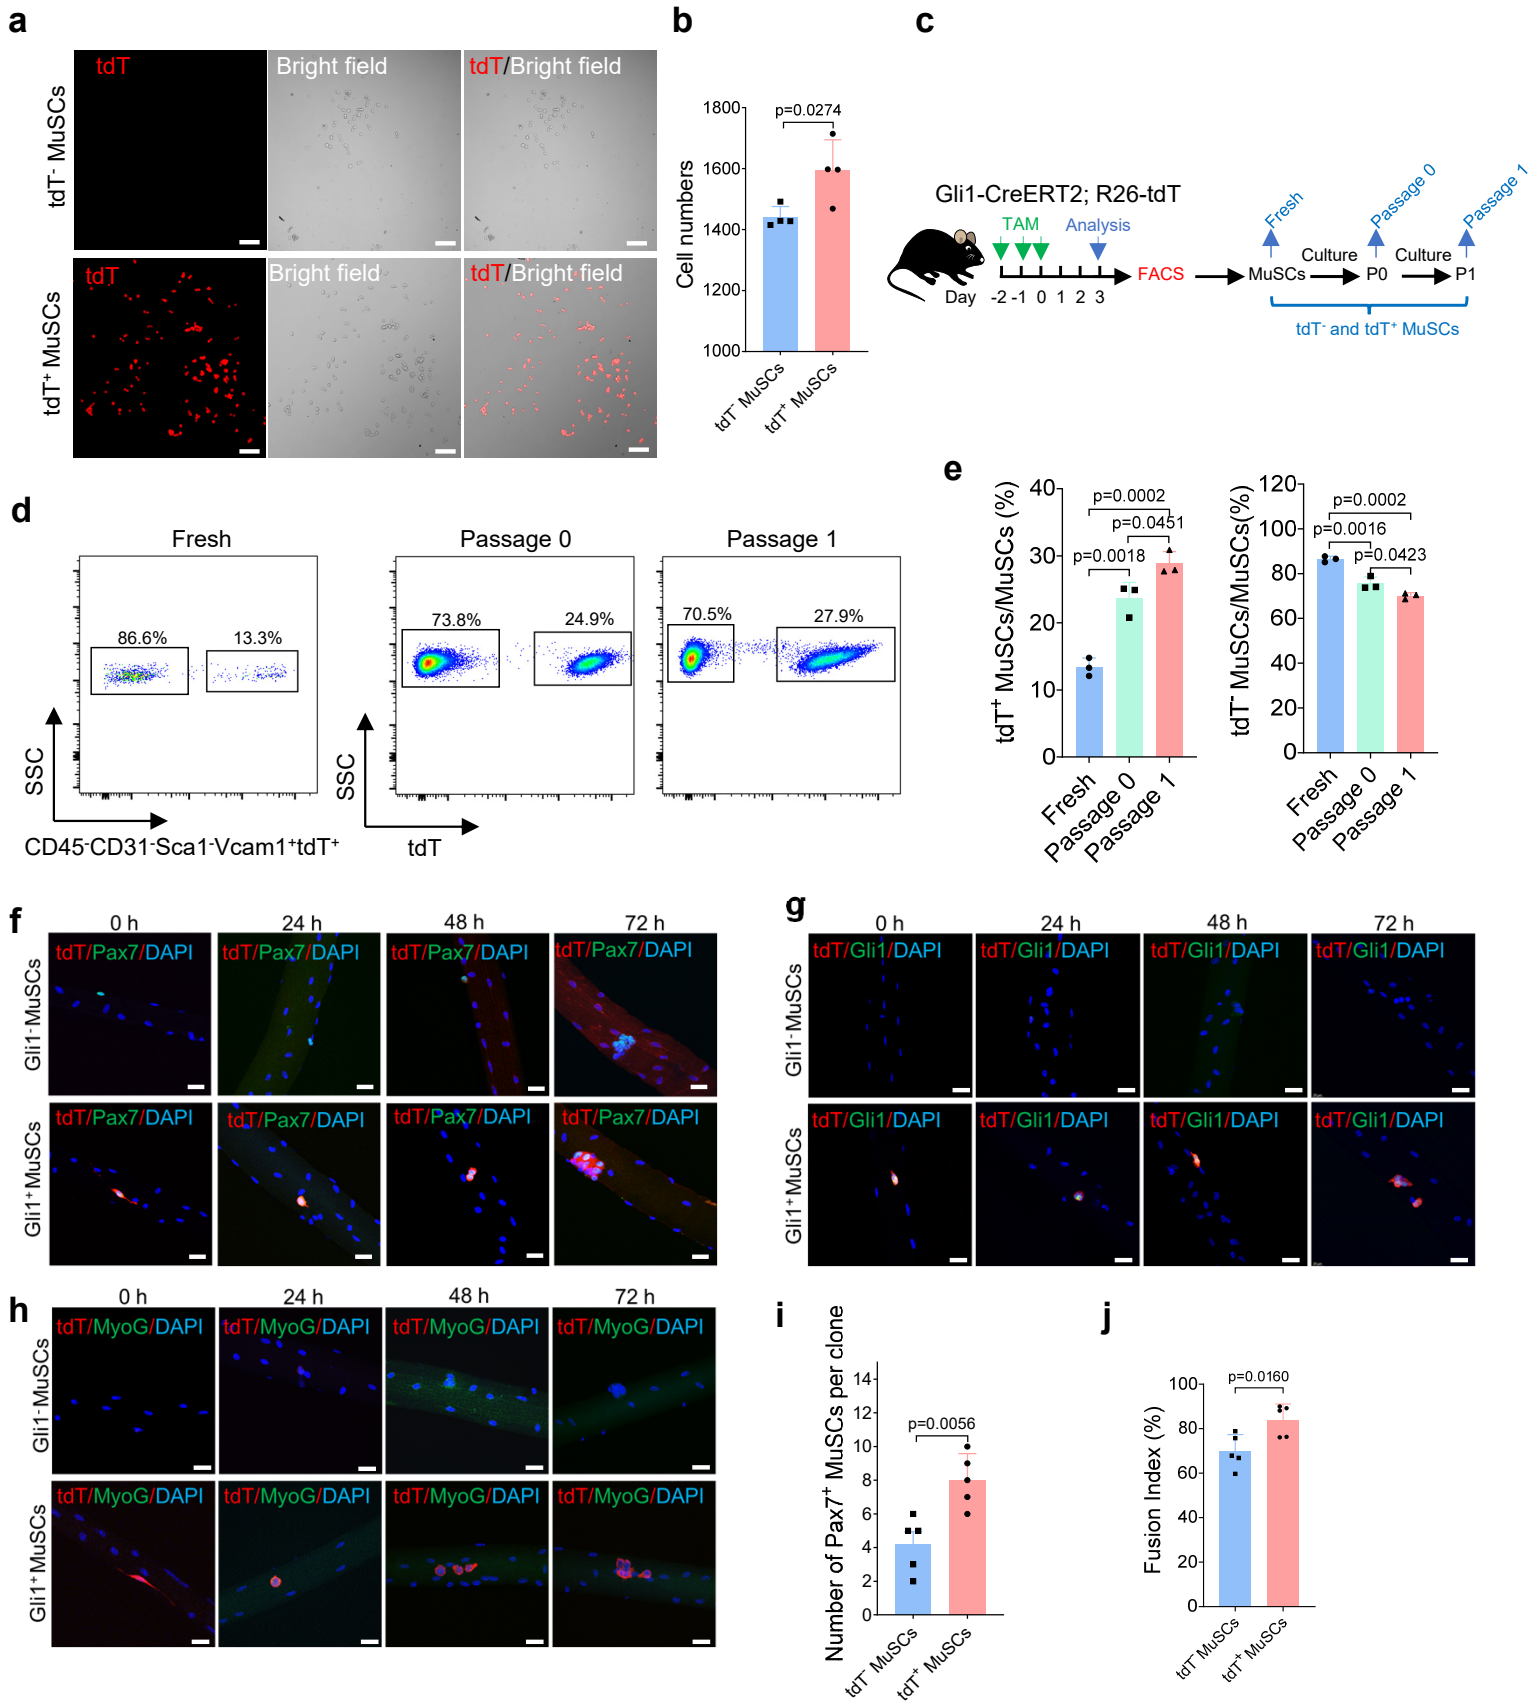

95 **Supplementary Fig. 7 Gli1<sup>+</sup> MuSCs undergo distinct numbers changes *in vitro*.**

96 **a, b** Equal numbers (1,000 cells) of FACS-isolated tdT<sup>+</sup> (Gli1<sup>+</sup>) or tdT<sup>-</sup> (Gli1<sup>-</sup>) MuSCs were  
97 cultured for 96 h (**a**, tdT: red) and quantification of the numbers of cells (**b**) (n = 4). Scale  
98 bars, 50 μm. **c** Schematic showing the experimental strategy. **d** FACS-sorted MuSCs  
99 were continuously passaged, and cell count determined at every passage is plotted. Flow  
100 cytometry analysis of the percentage of MuSCs expressing tdT (n = 3). **e** Quantifications  
101 of the percentage of tdT<sup>+</sup> (Gli1<sup>+</sup>) (Left panel) or tdT<sup>-</sup> (Gli1<sup>-</sup>) (Right panel) MuSCs (n = 3). **f**  
102 Immunofluorescence staining for tdT (red), Pax7 (green), and DAPI (blue) on the single  
103 EDL myofibers isolated from Gli1-CreERT2; R26-tdT mice and cultured for 0 h, 24 h, 48  
104 h and 72 h (n = 5). Scale bars, 20 μm. **g** Immunofluorescence staining for tdT (red), Gli1  
105 (green), and DAPI (blue) on the single EDL myofibers isolated from Gli1-CreERT2; R26-  
106 tdT mice and cultured for 0 h, 24 h, 48 h and 72 h (n = 5). Scale bars, 20 μm. **h**  
107 Immunofluorescence staining for tdT (red), MyoG (green), and DAPI (blue) on the single  
108 EDL myofibers isolated from Gli1-CreERT2; R26-tdT mice and cultured for 0 h, 24 h, 48  
109 h and 72 h (n = 5). Scale bars, 20 μm. **i** Quantifications of the number of Pax7<sup>+</sup>tdT<sup>+</sup> (Gli1<sup>+</sup>)  
110 or Pax7<sup>+</sup>tdT<sup>-</sup> (Gli1<sup>-</sup>) MuSCs per clone on muscle fibers (n = 5). **j** Fusion index of MyHC<sup>+</sup>  
111 myotubes differentiated from tdT<sup>+</sup> (Gli1<sup>+</sup>) or tdT<sup>-</sup> (Gli1<sup>-</sup>) MuSCs. Cells were collected 2  
112 days post differentiation (n = 5). Data are presented as mean ± SEM; Statistical  
113 significance was determined by two-tailed unpaired Student's *t* test (**b, i, j**) or one-way  
114 ANOVA (**e**). All numbers (n) are biologically independent experiments. Source data is  
115 provided in the Source Data File.

116

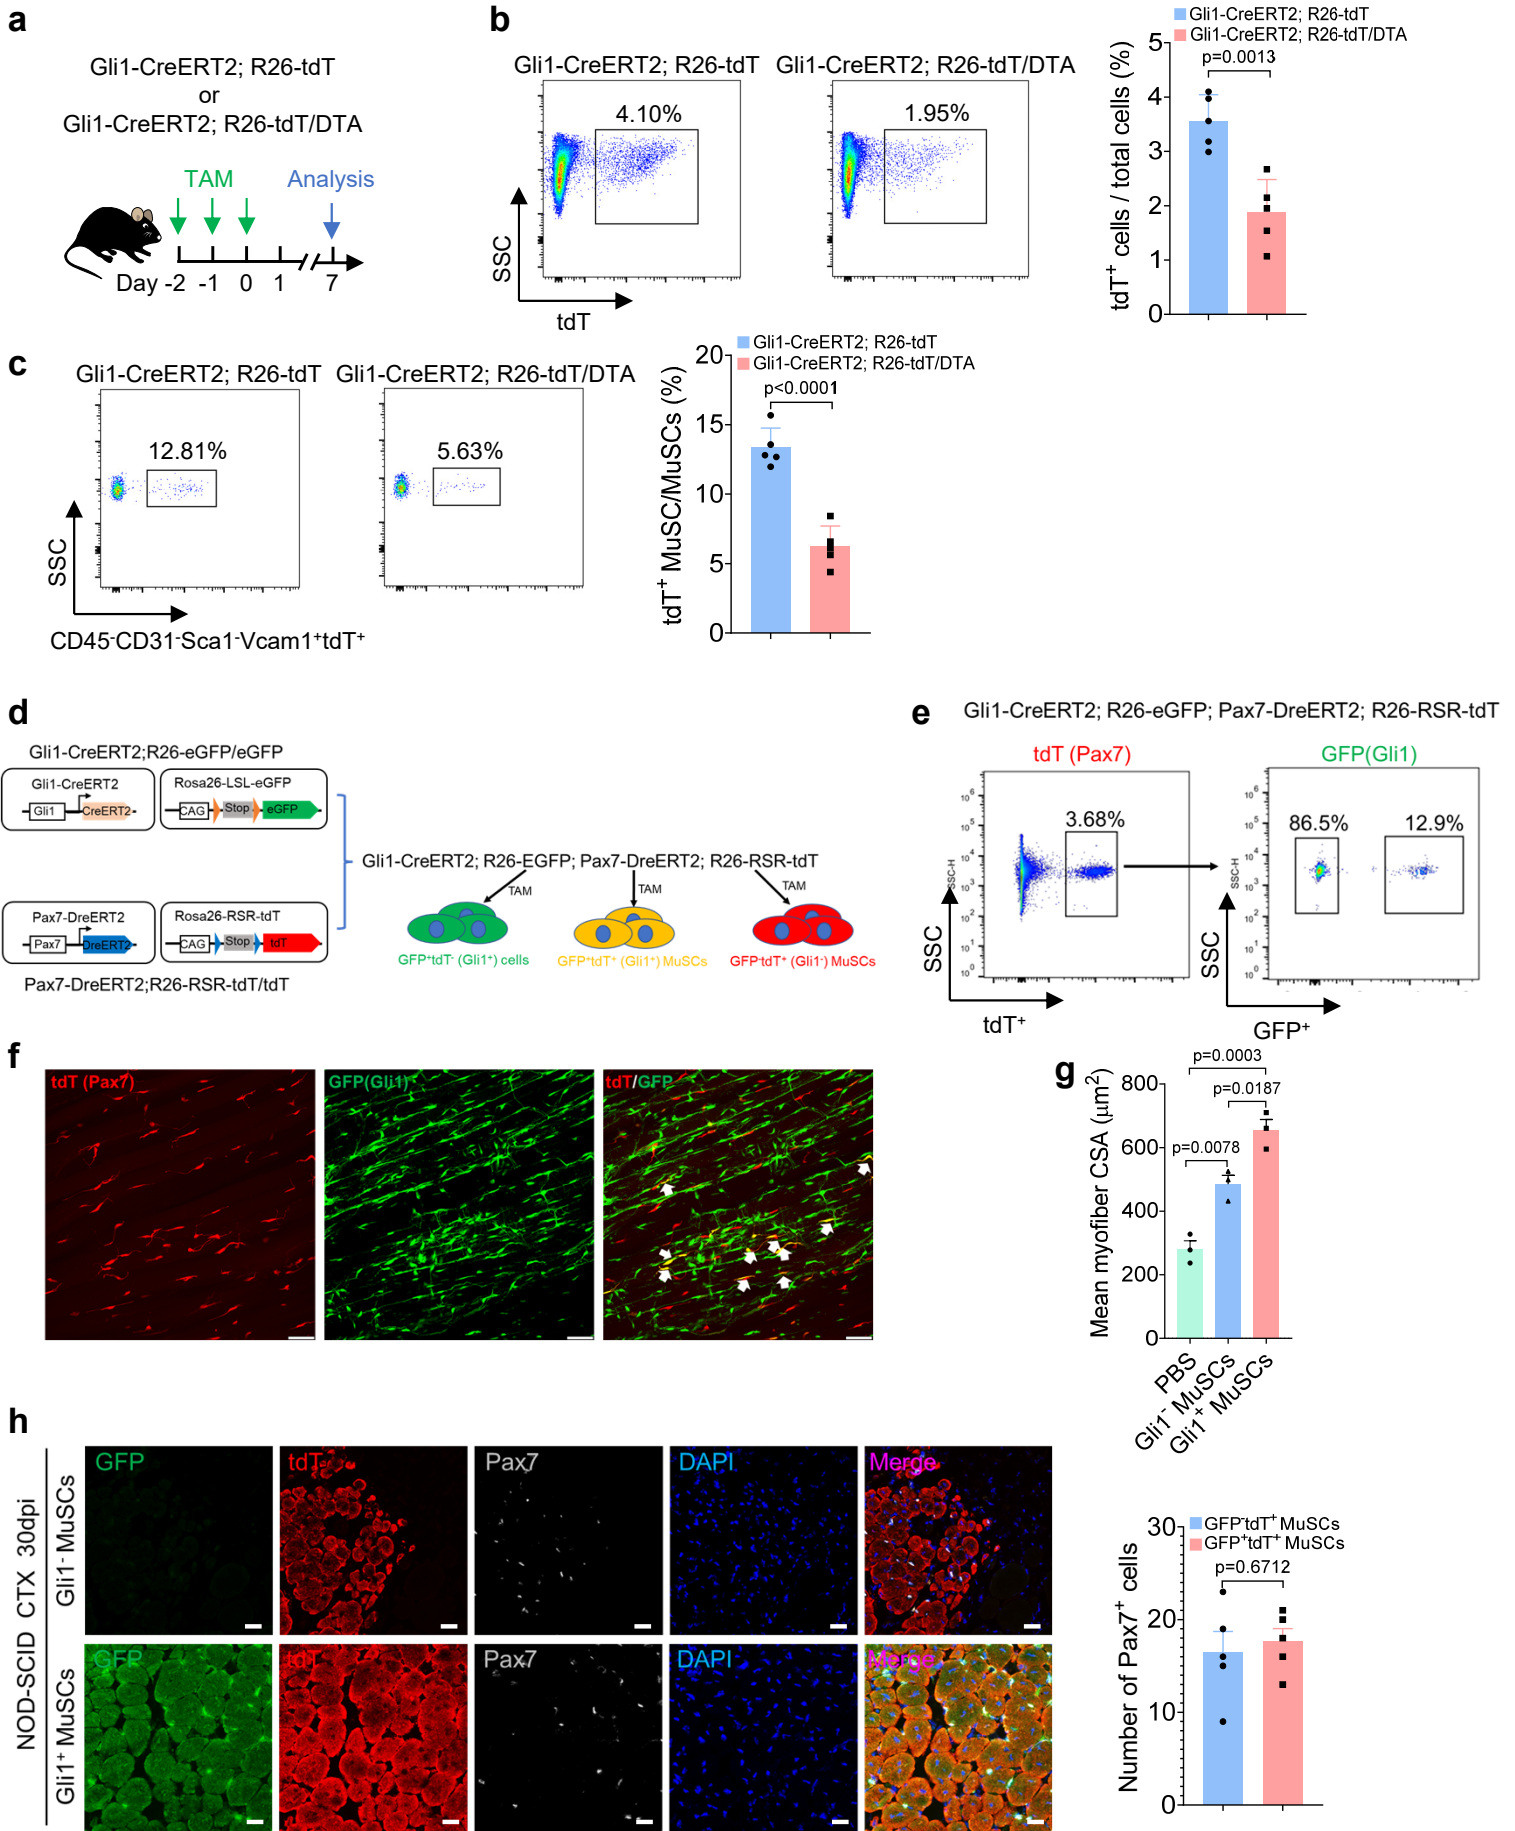



117 **Supplementary Fig. 8 Gli1<sup>+</sup> MuSCs are important for muscle regeneration *in vivo*.**

118 **a** Scheme of the experimental strategy. **b** Left panel: Fluorescence-activated cell sorter  
119 analysis of the percentage of muscle cells expressing tdT (n = 5). Right panel:  
120 Quantifications of the percentage of tdT<sup>+</sup> (Gli1<sup>+</sup>) cells (n = 5). **c** Left panel: Fluorescence-  
121 activated cell sorter analysis of the percentage of MuSCs expressing tdT (n = 5). Right  
122 panel: Quantifications of the percentage of tdT<sup>+</sup> (Gli1<sup>+</sup>) MuSCs (n = 5). **d** Scheme of the  
123 experimental strategy. **e** Reconstructed 3D images of the EDL of Gli1-CreERT2; R26-  
124 eGFP; Pax7-DreERT2; R26-RSR-tdT mice at 14 days after TAM treatment (n = 3).  
125 Images were obtained by Leica TCS SP8 confocal microscope (z-stack: 1 μm/slice, 200  
126 slices). White arrows indicate the GFP<sup>+</sup>tdT<sup>+</sup> (Gli1<sup>+</sup>) cells. Scale bar, 20 μm. **f**  
127 Fluorescence-activated cell sorter analysis of the percentage of muscle cells expressing  
128 tdT and the percentage of tdT<sup>+</sup> (Pax7<sup>+</sup>) cells expressing GFP(Gli1) (n = 3). **g**  
129 Quantification of the mean myofiber cross-section area (CSA μm<sup>2</sup>, n = 3). **h** Left panel:  
130 Immunofluorescence staining for tdT (red), GFP (green), Pax7 (gray) and DAPI (blue) in  
131 TA muscle sections from NOD-SCID mice at day 30 after transplantation (n = 5). Scale  
132 bars, 50 μm. Right panel: Quantification of the percentage of Pax7<sup>+</sup>Gli1<sup>+</sup> and Pax7<sup>+</sup>Gli1<sup>-</sup>  
133 cells at 30 days after transplantation (n = 5). Data are presented as mean ± SEM;  
134 Statistical significance was determined by two-tailed unpaired Student's *t* test (**b**, **c**, **h**) or  
135 one-way ANOVA (**d**). All numbers (n) are biologically independent experiments. Source  
136 data is provided in the Source Data File.

137

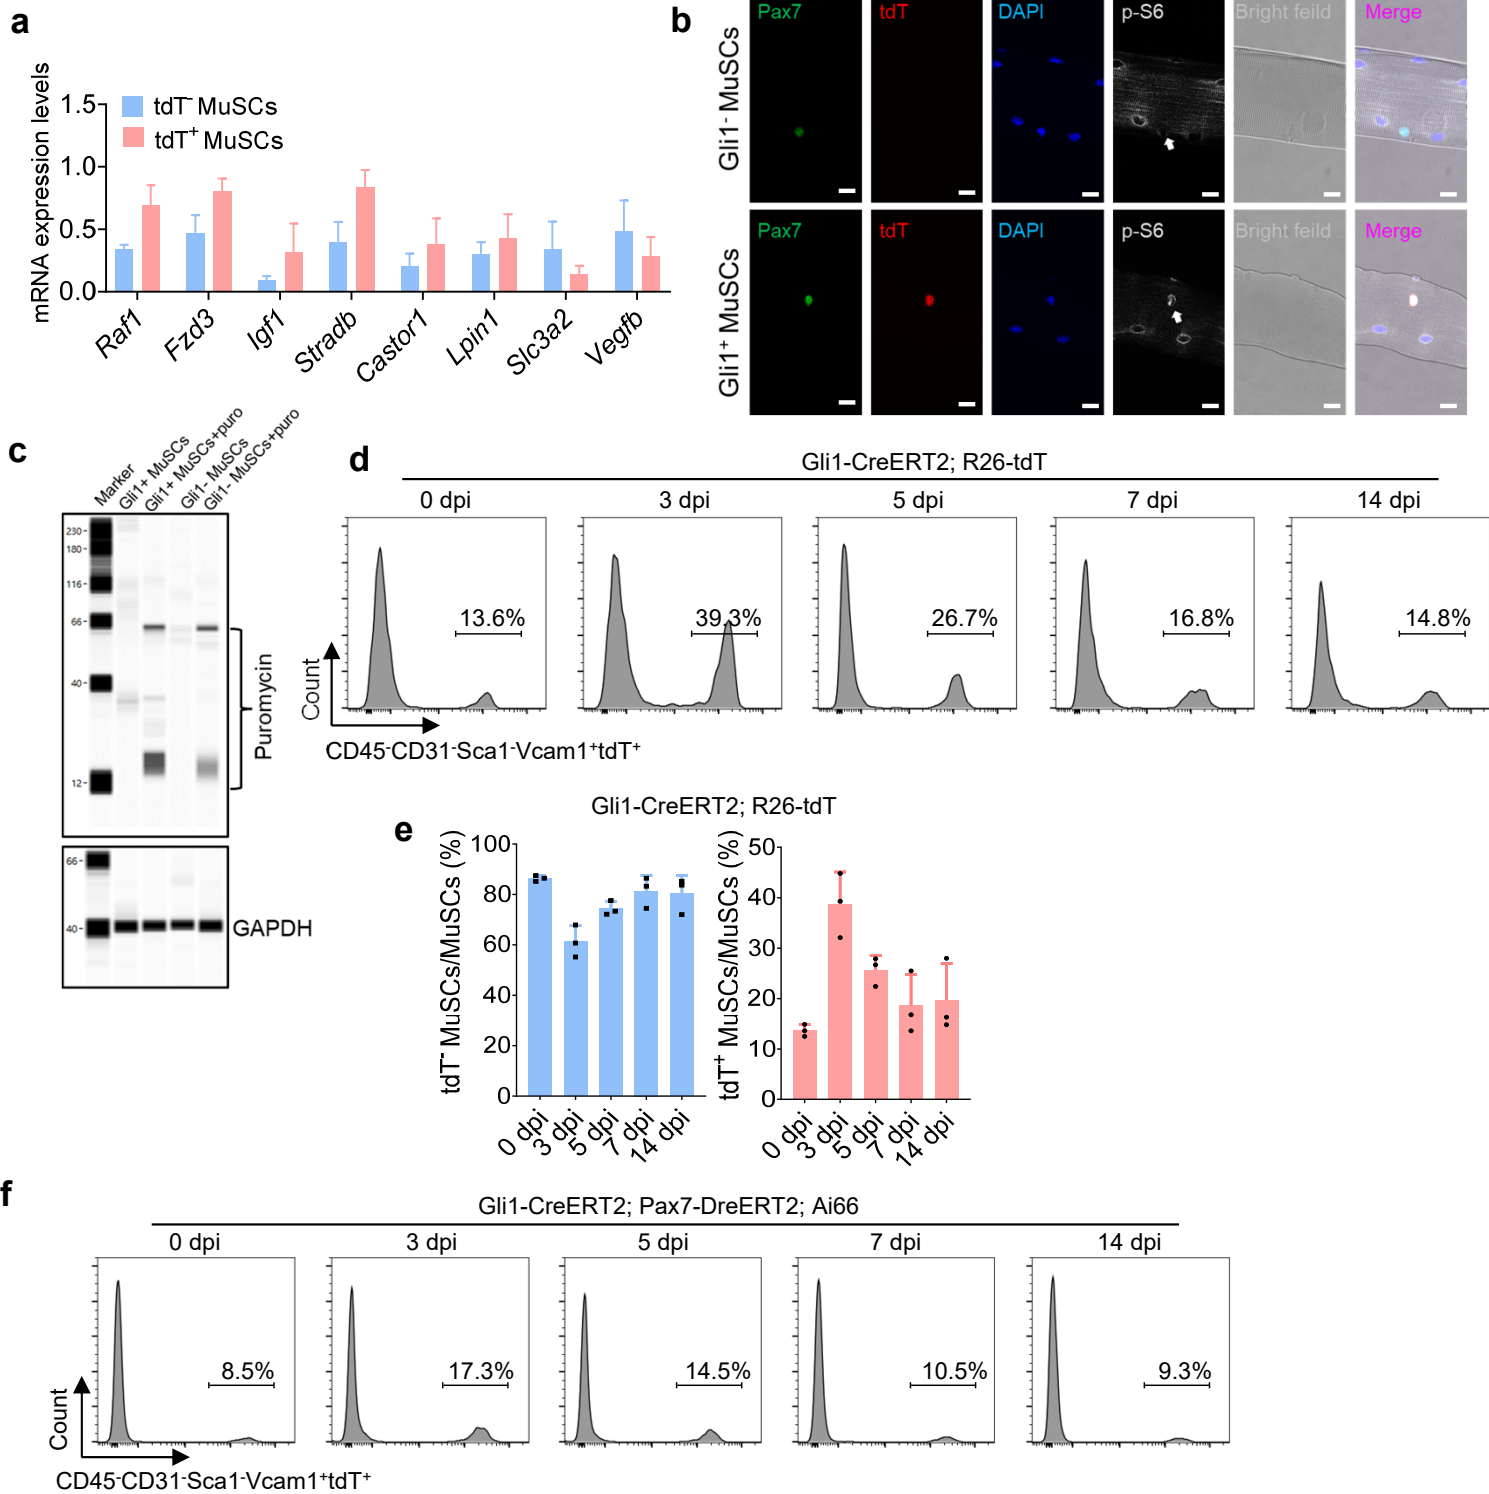

138 **Supplementary Fig. 9 Gli1<sup>+</sup> MuSCs display elevated mTOR signaling.**

139 **a** Relative mRNA levels of the mTOR signal pathway genes were measured by RT-qPCR  
140 (n = 3). The red histogram represents gene expression level in tdT<sup>+</sup> (Gli1<sup>+</sup>) MuSCs. The  
141 blue histogram represents gene expression level in tdT<sup>-</sup> (Gli1<sup>-</sup>) MuSCs. **b**  
142 Immunofluorescence staining for tdT (red), Pax7 (green), p-S6 (gray) and DAPI (blue) on  
143 the freshly isolated single EDL myofibers from Gli1-CreERT2; R26-tdT mice (n = 5). White  
144 arrows indicate the tdT<sup>+</sup>pS6<sup>+</sup> cells. Scale bars, 10  $\mu$ m. **c** Western blot for Puromycin and  
145 GAPDH (loading control) from tdT<sup>+</sup> (Gli1<sup>+</sup>) and tdT<sup>-</sup> (Gli1<sup>-</sup>) MuSCs using a capillary-based  
146 western blot automated system. **d** FACS analysis of the percentage of CD45<sup>-</sup>CD31<sup>-</sup>Sca1<sup>-</sup>  
147 Vcam1<sup>+</sup>tdT<sup>+</sup> MuSCs in total MuSCs from Gli1-CreERT2; R26-tdT mice at different time  
148 points after CTX injury (n = 3). dpi, days post-injury. **e** Quantification of the percentage of  
149 tdT<sup>+</sup> (Gli1<sup>+</sup>) and tdT<sup>-</sup> (Gli1<sup>-</sup>) MuSCs from Gli1-CreERT2; R26-tdT mice at different time  
150 points after CTX injury. The red histogram represents the percentage of tdT<sup>+</sup> (Gli1<sup>+</sup>)  
151 MuSCs (n = 3). The blue histogram represents the percentage of tdT<sup>-</sup> (Gli1<sup>-</sup>) MuSCs. dpi,  
152 days post-injury. **f** FACS analysis of the percentage of CD45<sup>-</sup>CD31<sup>-</sup>Sca1<sup>-</sup>Vcam1<sup>+</sup>tdT<sup>+</sup>  
153 MuSCs in total MuSCs from Gli1-CreERT2; Pax7-DreERT2; Ai66 mice at different time  
154 points after CTX injury (n = 3). dpi, days post-injury. Data are presented as mean  $\pm$  SEM.  
155 All numbers (n) are biologically independent experiments. Source data is provided in the  
156 Source Data File.

157

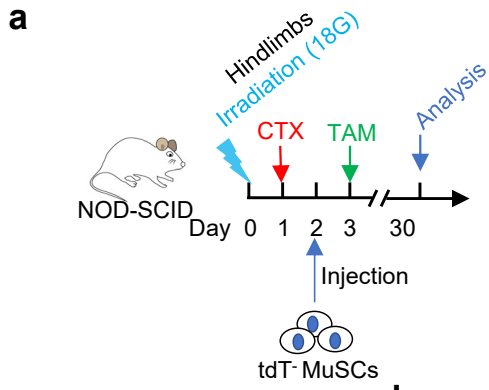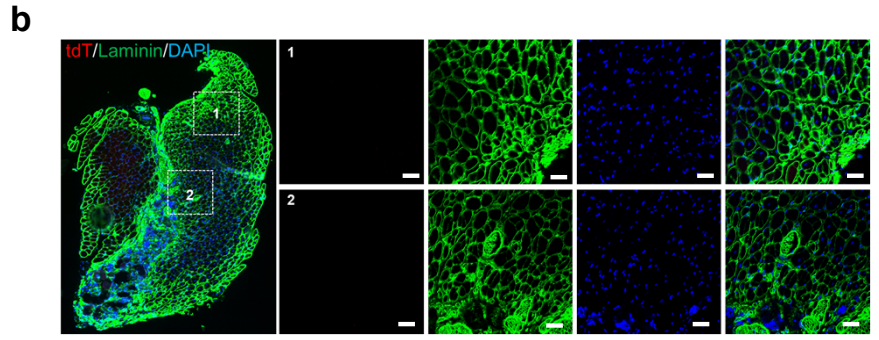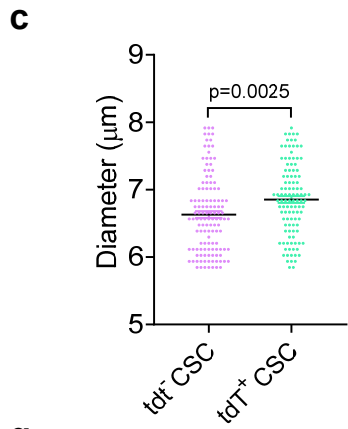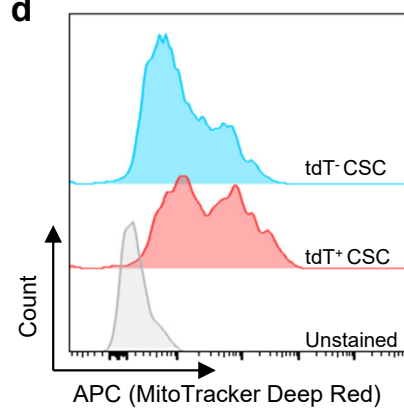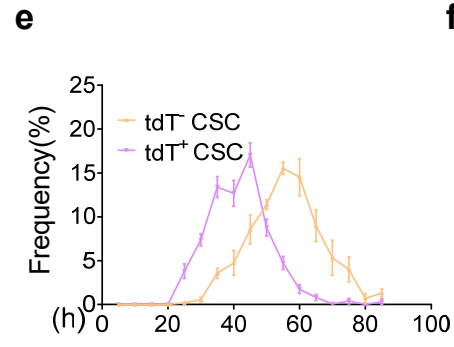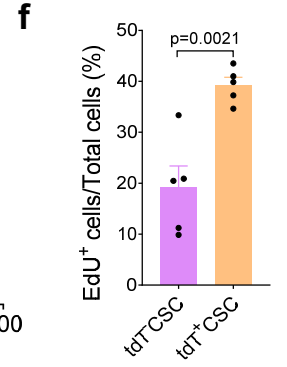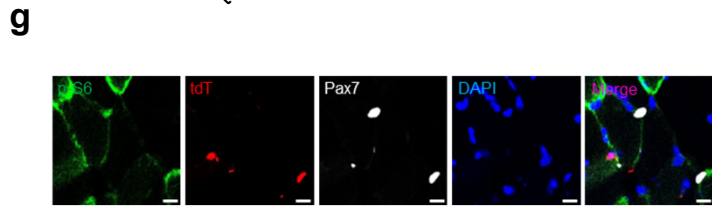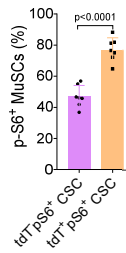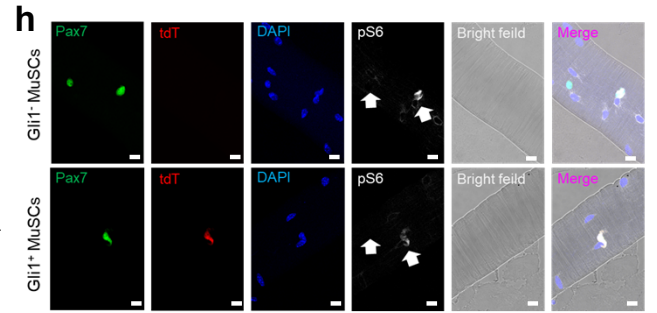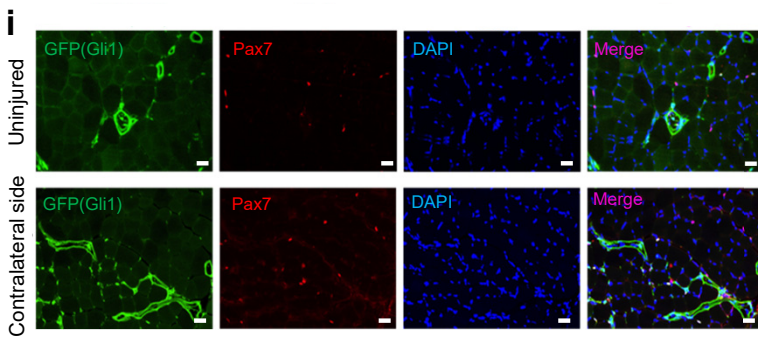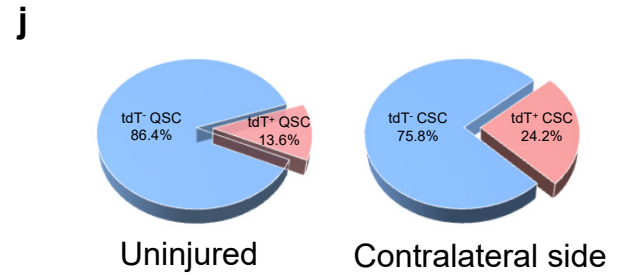

158 **Supplementary Fig. 10 Gli1<sup>+</sup> MuSCs are function as rapid response cells after injury.**

159 **a** Scheme of the experimental strategy. **b** Particular numbers (5,000 cells) of freshly  
160 isolated tdT<sup>-</sup> (Gli1<sup>-</sup>) MuSCs from Gli1-CreERT2; R26-tdT mice were transplanted into pre-  
161 injured TA muscle of the NOD-SCID mice. TA muscles were harvested 30 days after  
162 transplantation. Immunofluorescence staining for tdT (red), Laminin (green) and DAPI  
163 (blue) on TA muscle sections from NOD-SCID mice (n = 3). The boxed regions are  
164 magnified in the panels 1 and 2 with split channels. Scale bars, 50 μm. **c** The diameter of  
165 from tdT<sup>-</sup> (Gli1<sup>-</sup>) and tdT<sup>+</sup> (Gli1<sup>+</sup>) CSCs were measured using a Coulter Multisizer 4e. n =  
166 1,000 cells from 3 mice per group. **d** Representative plots of tdT<sup>+</sup> (Gli1<sup>+</sup>) and tdT<sup>-</sup> (Gli1<sup>-</sup>)  
167 CSCs stained with MitoTracker Deep Red (MTDR) (n = 5). The blue represents the tdT<sup>-</sup>  
168 (Gli1<sup>-</sup>) CSCs stained with MTDR. The red represents the tdT<sup>+</sup> (Gli1<sup>+</sup>) CSCs stained with  
169 MTDR. The gray represents unstained. **e** Time to the first division in tdT<sup>+</sup> (Gli1<sup>+</sup>) and tdT<sup>-</sup>  
170 (Gli1<sup>-</sup>) CSCs was measured by time-lapse microscopy. n = 60 cells from 3 mice per group.  
171 **f** Equal numbers of FACS-isolated tdT<sup>+</sup> (Gli1<sup>+</sup>) and tdT<sup>-</sup> (Gli1<sup>-</sup>) CSCs were cultured and  
172 labeled with EdU for 40 h, then immunofluorescence stained for tdT and EdU (n = 5).  
173 Quantification of the percentage of tdT<sup>+</sup> (Gli1<sup>+</sup>) and tdT<sup>-</sup> (Gli1<sup>-</sup>) CSCs with incorporated  
174 EdU (n = 5). **g** Left panel: Immunofluorescence staining for p-S6 (green), tdT (red), Pax7  
175 (white) and DAPI (blue) on TA muscle sections (CSC) (n = 7). Scale bars, 10 μm. Right  
176 panel: Quantification of the percentage of tdT<sup>+</sup> (Gli1<sup>+</sup>) and tdT<sup>-</sup> (Gli1<sup>-</sup>) CSCs expressing  
177 p-S6 (n = 7). **h** Immunofluorescence staining for tdT (red), Pax7 (green), p-S6 (gray) and  
178 DAPI (blue) on the cultured for 24 h single EDL myofibers (n = 5). White arrows indicate  
179 the tdT<sup>+</sup>pS6<sup>+</sup> or tdT<sup>-</sup>pS6<sup>+</sup> cells. Scale bars, 10 μm. **i** Immunofluorescence staining for Pax7  
180 (red), GFP (green) and DAPI (blue) on TA muscle sections of uninjured or 1 day after

181 CTX injury (n = 8). Scale bars, 20  $\mu$ m. **j** Left panel: Quantification of the percentage of  
182 tdT<sup>+</sup> (Gli1<sup>+</sup>) and tdT<sup>-</sup> (Gli1<sup>-</sup>) QSCs from Gli1-CreERT2; R26-tdT mice without injury. The  
183 blue histogram represented the percentage of tdT<sup>-</sup> (Gli1<sup>-</sup>) QSCs. The red histogram  
184 represented the percentage of tdT<sup>+</sup> (Gli1<sup>+</sup>) QSCs. Right panel: Quantification of the  
185 percentage of tdT<sup>+</sup> (Gli1<sup>+</sup>) and tdT<sup>-</sup> (Gli1<sup>-</sup>) CSCs from the contralateral TA muscle of  
186 injured Gli1-CreERT2; R26-tdT mice 1 day after CTX injury. The blue histogram  
187 represented the percentage of tdT<sup>-</sup> (Gli1<sup>-</sup>) CSCs. The red histogram represented the  
188 percentage of tdT<sup>+</sup> (Gli1<sup>+</sup>) CSCs. Data are presented as mean  $\pm$  SEM; Statistical  
189 significance was determined by two-tailed unpaired Student's *t* test (**c, f**). All numbers (n)  
190 are biologically independent experiments. Source data is provided in the Source Data File.  
191

192 **Supplementary Table 1: The absolute number of Gli1<sup>-</sup> and Gli1<sup>+</sup> MuSCs from Gli1-**  
 193 **CreERT2; R26-tdT mice at different time points after CTX injury.**

| Sample name  | Number (via FACS) |       |                         |                         | The absolute number |                         |                         |
|--------------|-------------------|-------|-------------------------|-------------------------|---------------------|-------------------------|-------------------------|
|              | Beads             | MuSCs | Gli1 <sup>+</sup> MuSCs | Gli1 <sup>-</sup> MuSCs | MuSCs               | Gli1 <sup>+</sup> MuSCs | Gli1 <sup>-</sup> MuSCs |
| mouse #1-D0  | 23621             | 525   | 79                      | 446                     | 822                 | 124                     | 699                     |
| mouse #2-D3  | 166               | 4447  | 1300                    | 3144                    | 991199              | 289759                  | 700771                  |
| mouse #3-D5  | 318               | 4233  | 1183                    | 3045                    | 492519              | 137645                  | 354292                  |
| mouse #4-D7  | 518               | 3341  | 770                     | 2571                    | 238643              | 55000                   | 183643                  |
| mouse #5-D14 | 7218              | 1978  | 304                     | 1670                    | 10139               | 1558                    | 8561                    |

194

| Sample name  | The number of MuSCs/All event (%) | Gli1 <sup>+</sup> MuSCs/All MuSCs (%) | Gli1 <sup>-</sup> MuSCs/All MuSCs (%) |
|--------------|-----------------------------------|---------------------------------------|---------------------------------------|
| mouse #1-D0  | 2.64                              | 15                                    | 85                                    |
| mouse #2-D3  | 61.1                              | 29.2                                  | 70.7                                  |
| mouse #3-D5  | 44.7                              | 27.9                                  | 71.9                                  |
| mouse #4-D7  | 26                                | 23                                    | 77                                    |
| mouse #5-D14 | 5.93                              | 15.4                                  | 84.4                                  |

195

196

197 **Supplementary Table 2: List of primary antibodies used for experiments**

| <b>Primary antibody</b>      | <b>Species</b> | <b>Dilution</b> | <b>Applications</b> | <b>Source</b> | <b>Catalog number</b> |
|------------------------------|----------------|-----------------|---------------------|---------------|-----------------------|
| Laminin                      | rabbit         | 1:250           | IF                  | Abcam         | ab11575               |
| Laminin                      | rat            | 1:100           | IF                  | Abcam         | ab11576               |
| Pax7                         | mouse          | 1:100           | IF                  | DSHB          | AB_528428             |
| PDGFR $\alpha$               | goat           | 1:100           | IF                  | R&D           | AF1062                |
| DsRed                        | rabbit         | 1:500           | IF                  | Clontech      | 632496                |
| mcherry                      | goat           | 1:500           | IF                  | SICGEN        | AB0081-200            |
| $\beta$ -gal                 | rabbit         | 1:250           | IF                  | Abcam         | ab221199              |
| MyHC                         | rabbit         | 1:500           | IF, WB              | Sigma         | 05-716                |
| MyoD                         | mouse          | 1:100           | IF, WB              | Santa cruz    | Sc-377460             |
| MyoG                         | mouse          | 1:100           | IF, WB              | DSHB          | AB_2146602            |
| Myf5                         | rabbit         | 1:100           | IF                  | Sigma         | SAB4501943            |
| eMHC                         | mouse          | 1:20            | IF                  | DSHB          | AB_528358             |
| CD34                         | rabbit         | 1:200           | IF                  | Abcam         | ab81289               |
| GFP<br>(FITC-conjugated)     | goat           | 1:400           | IF                  | Abcam         | ab6662                |
| Gli1                         | rabbit         | 1:200           | IF                  | NOVUS         | NB600-600             |
| Gli1                         | rabbit         | 1:1000          | WB                  | CST           | 2534S                 |
| p-S6                         | rabbit         | 1:200           | IF, WB              | CST           | 4858S                 |
| tubulin                      | rabbit         | 1:1000          | WB                  | Abclonal      | AC015                 |
| GAPDH                        | rabbit         | 1:1000          | WB                  | CST           | 2118S                 |
| CD45<br>(FITC-conjugated)    | rat            | 1:100           | FC                  | BioLegend     | 157214                |
| CD31<br>(FITC-conjugated)    | rat            | 1:100           | FC                  | BioLegend     | 160212                |
| Sca1<br>(FITC-conjugated)    | rat            | 1:100           | FC                  | BioLegend     | 108106                |
| VCAM1<br>(APC-conjugated)    | rat            | 1:100           | FC                  | BioLegend     | 105717                |
| VCAM1<br>(PE/cy7-conjugated) | rat            | 1:100           | FC                  | BioLegend     | 105720                |



**Supplementary Table 3: List of primer sequences used for RT-qPCR**

| <b>Gene</b>    | <b>Pimer sequences (5'-3')</b>                               |
|----------------|--------------------------------------------------------------|
| <i>Raf1</i>    | Fw - CTCTGAAGGTGAGAGGCCTG<br>Rv - CGGCATCGGTGTTCCAATCT       |
| <i>Fzd3</i>    | Fw - GTTGCAGTGCAGAGGGACTA<br>Rv - GGACATGGTGGCGAACAATC       |
| <i>Igf1</i>    | Fw - CTGGACCAGAGACCCTTTGC<br>Rv - GGACGGGGACTTCTGAGTCTT      |
| <i>Stradb</i>  | Fw - CTTGACCTCTGTTTCATCTTGCAC<br>Rv - GGAGAAATAACCCAAAGCCAGC |
| <i>Castor1</i> | Fw - GAGTACTGAGCATTGCCCGT<br>Rv - CAGGCTGAAGAACTTGCACC       |
| <i>Lpin1</i>   | Fw - CTCCGCTCCCGAGAGAAAG<br>Rv - TCATGTGCAAATCCACGGACT       |
| <i>Slc3a2</i>  | Fw - GACACCGAAGTGGACATGAAA<br>Rv - GCTCCTCCTTGGATAAGCCG      |
| <i>Stk11</i>   | Fw - TGGGCATGGACACCTTCATC<br>Rv - AGGTCCCCCATCAGGTACTION     |
| <i>Vegfb</i>   | Fw - GCCAGACAGGGTTGCCATAC<br>Rv - GGAGTGGGATGGATGATGTCAG     |
| <i>Pax7</i>    | Fw - TCTCCAAGATTCTGTGCCGAT<br>Rv - CGGGGTTCTCTCTTATACTCC     |
| <i>MyoD</i>    | Fw - ATGATGACCCGTGTTTCGACT<br>Rv - CACCGCAGTAGGGAAGTGT       |
| <i>MyoG</i>    | Fw - GCAGGCTCAAGAAAGTGAATGA<br>Rv - TAGGCGCTCAATGTACTION     |

|              |                                                             |
|--------------|-------------------------------------------------------------|
| <i>Myf5</i>  | Fw - GCCTTCGGAGCACACAAAG<br>Rv - TGACCTTCTTCAGGCGTCTAC      |
| <i>Cd34</i>  | Fw - AAGGCTGGGTGAAGACCCTTA<br>Rv - TGAATGGCCGTTTCTGGAAGT    |
| <i>Hhip</i>  | Fw - TGAAGATGCTCTCGTTTAAGCTG<br>Rv - CCACCACACAGGATCTCTCC   |
| <i>Gli3</i>  | Fw - GAAGAAACGCAATCACTATGCAG<br>Rv - GTCCCACGGTAAGGGAGAGA   |
| <i>Ptch1</i> | Fw - AAAGAACTGCGGCAAGTTTTTG<br>Rv - CTTCTCCTATCTTCTGACGGGT  |
| <i>Gli1</i>  | Fw - CCAAGCCAACTTTATGTCAGGG<br>Rv - AGCCCGCTTCTTTGTTAATTTGA |
| <i>Gapdh</i> | Fw - AGGTCGGTGTGAACGGATTTG<br>Rv - TGTAGACCATGTAGTTGAGGTCA  |
